# Supplementary material
Source: PubMed Central journal article supplement (PMC5767126)
Supplement: NIHMS854313-supplement-Supplemental.pdf [file NIHMS854313-supplement-Supplemental.pdf]

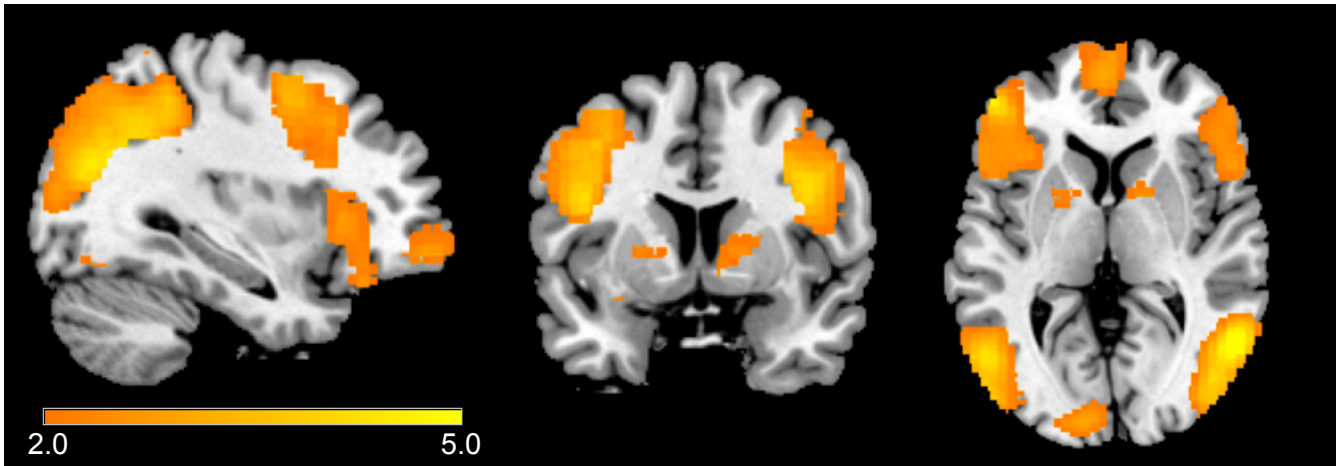

Supplemental Figure 1. Individuals without a history of abuse and their response to Drug minus Neutral (threshold  $2 < t < 5$ , first half). At this reduced threshold (compared to Figure 2), the NoAbuse group had activity within some of the ROI mask regions, such as the striatum and anterior insula.
